# Supplementary material for: Evidence-based recommendations for energy intake in pregnant women with obesity
Source: JCI journal article supplement (doi:10.1172/jci130341), 2019-08-01
Supplement: sd2 [file 2]

301 Moved Permanently

# Moved Permanently

The document has moved here.
